# Supplementary material
Source: Springer Nature journal article supplement (https://www.springermedizin.de/resource/supplementary/12943_2014_1463_MOESM5_ESM.pdf/9553068)

MCF-7

T47D

MDA-MB-231

Cell viability

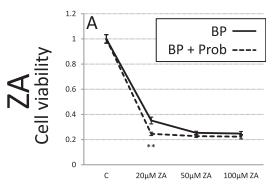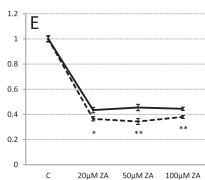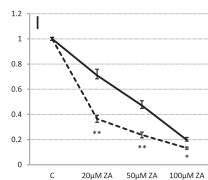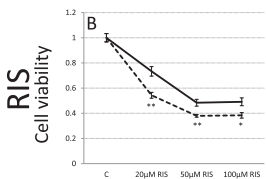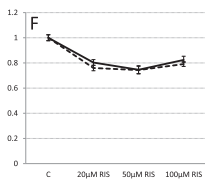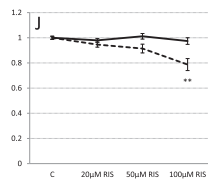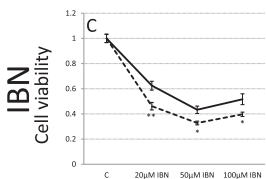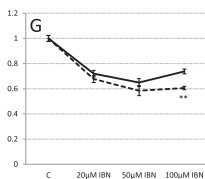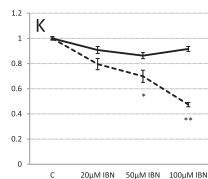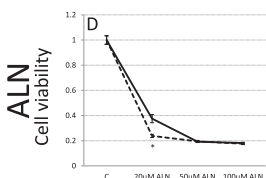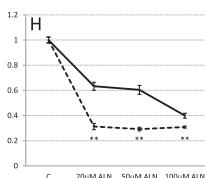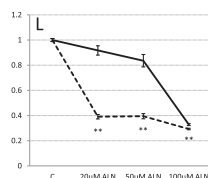

Caspase 3/7 activity

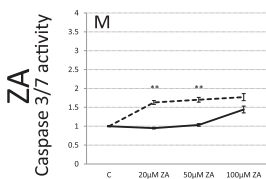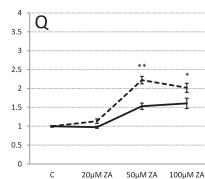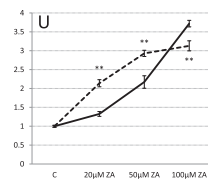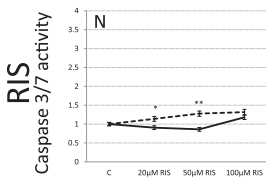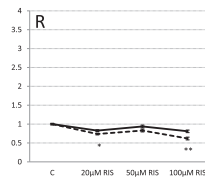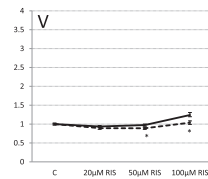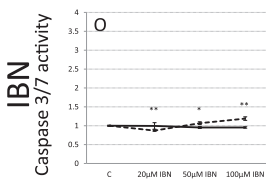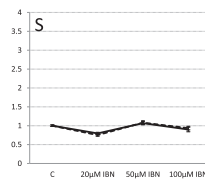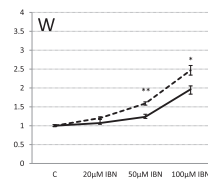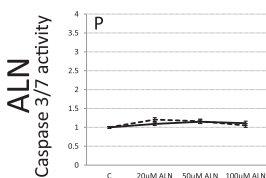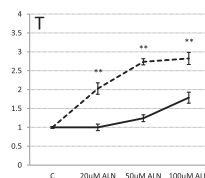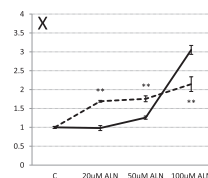

Supplement: MOESM5 [file 9553068]
